# Supplementary material for: Activity of layered swedenborgite structured Y0.8Er0.2BaCo3.2Ga0.8O7+δ for oxygen electrode reactions in at intermediate temperature reversible ceramic cells
Source: Royal Society of Chemistry journal article supplement (doi:10.1039/d0ta11000k), 2020-12-10
Supplement: d0ta11000k1.pdf [file d0ta11000k1.pdf]

## Electronic Supplementary Information

### Activity of layered swedenborgite structured $Y_{0.8}Er_{0.2}BaCo_{3.2}Ga_{0.8}O_{7+\delta}$ for oxygen electrode reactions in at intermediate temperature reversible ceramic cells

Ji-Seop Shin <sup>a</sup>, Hyunyoung Park <sup>a</sup>, Kwangho Park <sup>a</sup>, Muhammad Saqib <sup>a</sup>, Minkyong Jo <sup>a</sup>, Jung  
Hyun Kim <sup>b</sup>, Hyung-Tae Lim <sup>c</sup>, Minseuk Kim <sup>a</sup>, Jongsoon Kim <sup>a</sup>, Jun-Young Park <sup>a,\*</sup>

<sup>a</sup> HMC, Department of Nanotechnology and Advanced Materials Engineering, Sejong  
University, Seoul 05006, Korea

<sup>b</sup> Department of Advanced Materials Science and Engineering, Hanbat National University,  
Daejeon 34158, Korea

<sup>c</sup> School of Materials Science and Engineering, Changwon National University, Changwon  
51140, Korea

\* Correspondence and requests for materials should be addressed to J.-Y. Park (email:  
jyoung@sejong.ac.kr; Tel: +82 2 3408 3848).

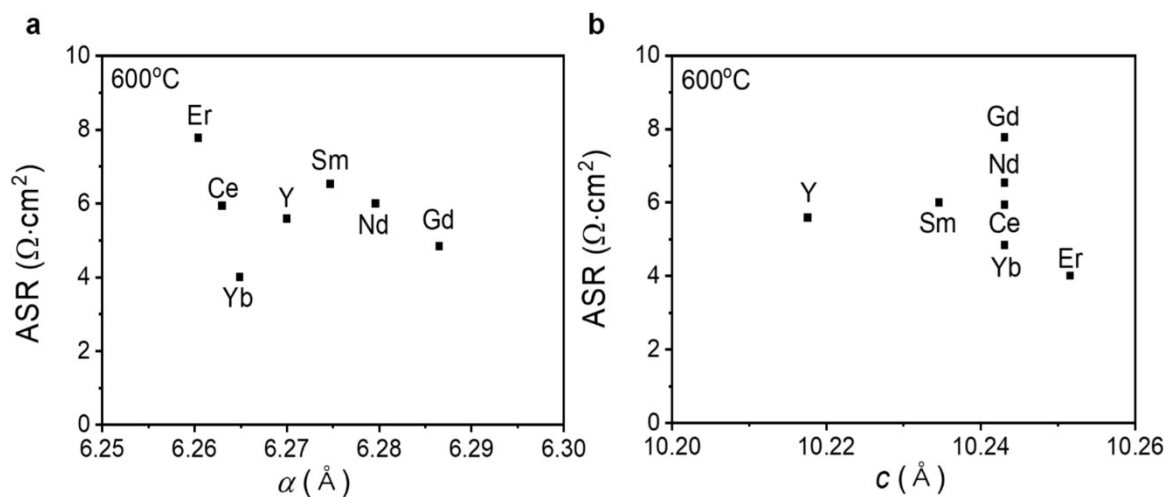

**Fig. S1** a-b) ASRs of  $\text{Y}_{0.9}\text{Ln}_{0.1}\text{BaCo}_4\text{O}_{7+\delta}$  (YLBC) symmetric cells as a function of cell parameters  $a$ - (a) and  $c$ -axes (b) at 600 °C.

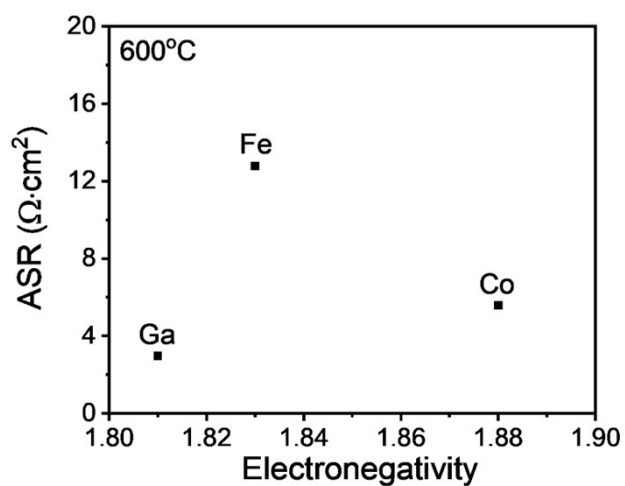

**Fig. S2** ASRs of  $\text{YBaCo}_{3.6}\text{Tr}_{0.4}\text{O}_{7+\delta}$  (YBCT) symmetric cells versus electronegativity of dopants at 600 °C.

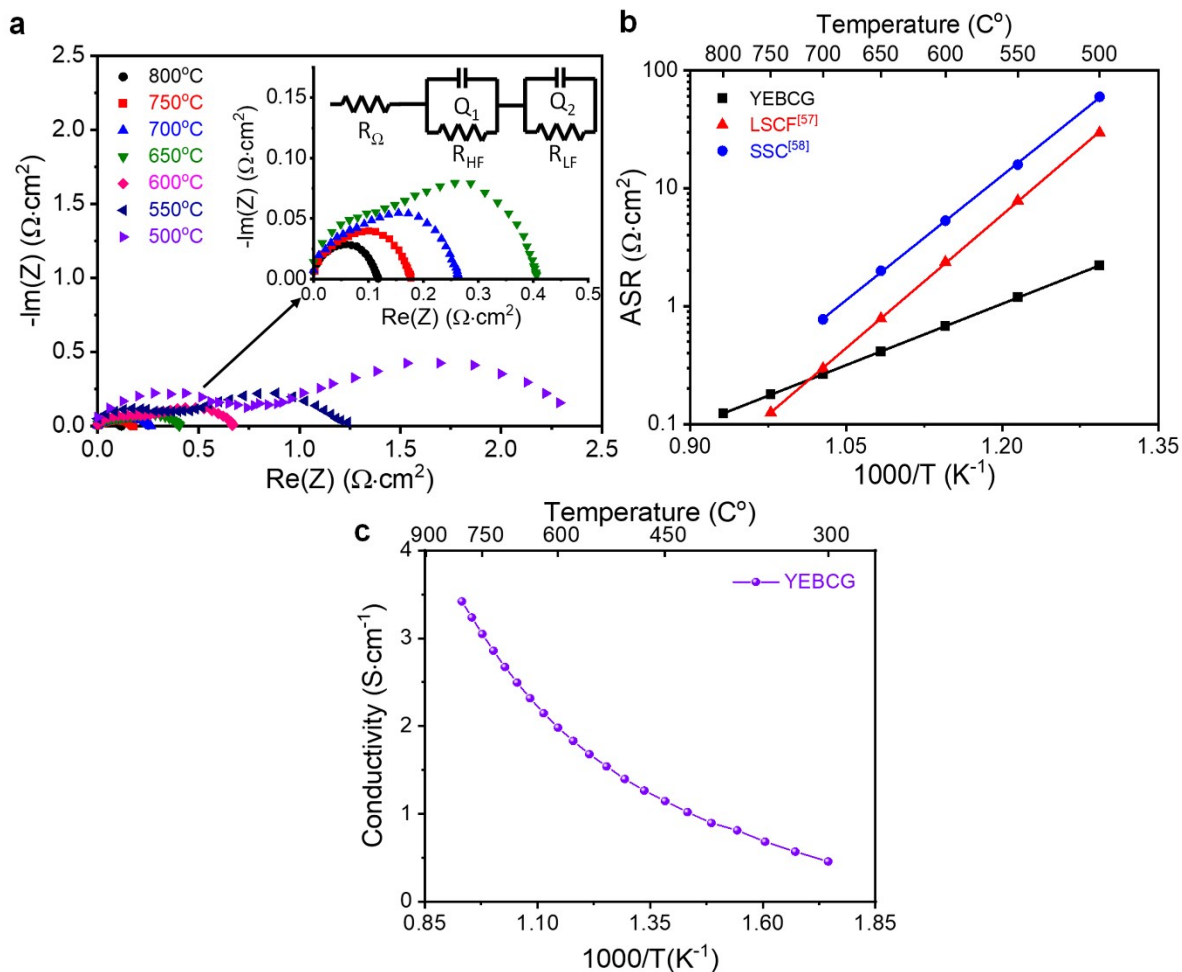

**Fig. S3** a) EIS spectra of a YBCG symmetric cell under OCV in ambient air at 500–700 °C. Inset shows two parallel R-Q circuits to fit the EIS data. b) Comparisons of ASRs of YBCG to the other perovskite structured air electrode materials at intermediate temperatures. c) Electrical conductivity of the YBCG in the temperature range of 300–800 °C.

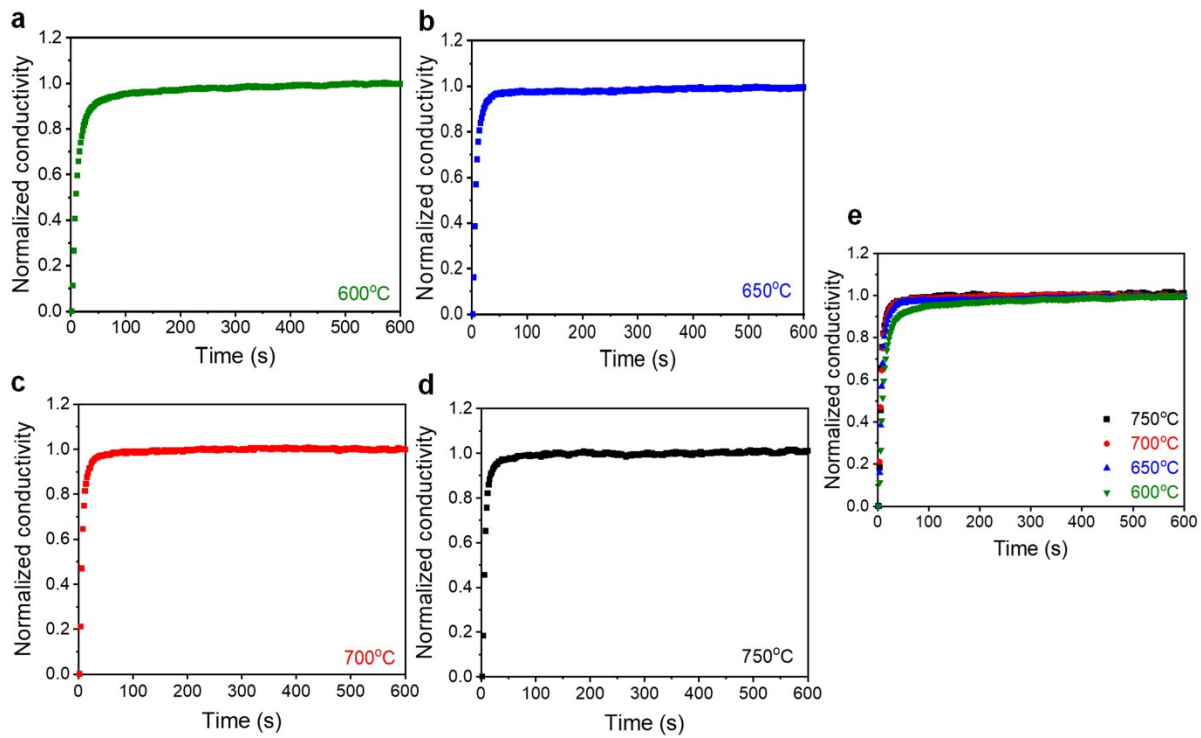

**Fig. S4** Normalized electrical conductivity relaxation profiles of YBCG after a sudden change in  $pO_2$  ( $-1.98 \leq \log(pO_2/\text{atm}) \leq -0.68$ ) at 600–750 °C. a) 600 °C. b) 650 °C. c) 700 °C. d) 750 °C. e) 600–750 °C.

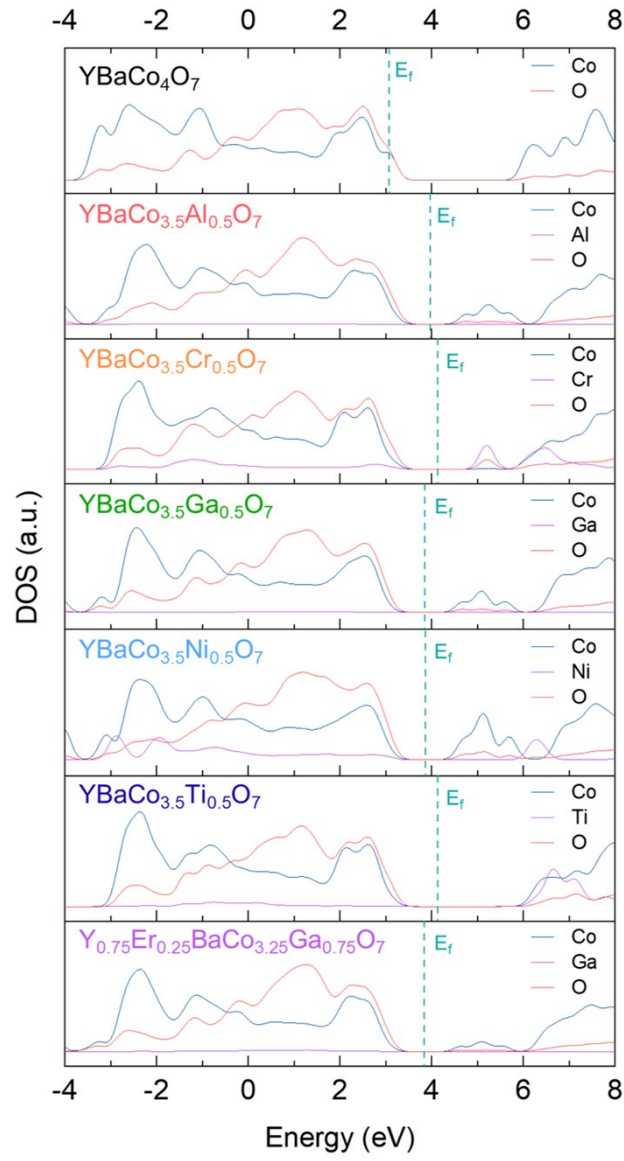

**Fig. S5** Projected DOS of  $\text{Y}_{1-x}\text{Er}_x\text{BaCo}_{4-y}\text{Tr}_y\text{O}_{7+\delta}$  ( $x = 0.25$ ;  $y = 0.5$  and  $0.75$ ;  $\text{Tr} = \text{Ga}, \text{Ni}, \text{Cr}, \text{Al},$  and  $\text{Ti}$ ).  $E_f$  is fermi level.

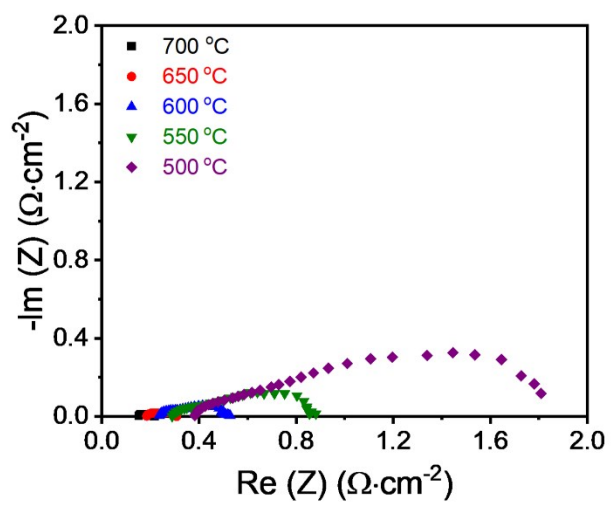

**Fig. S6** EIS spectra of YBCG RPCCs under OCV (3% humidified  $\text{H}_2$  Fuel and air) at 500–700 °C.

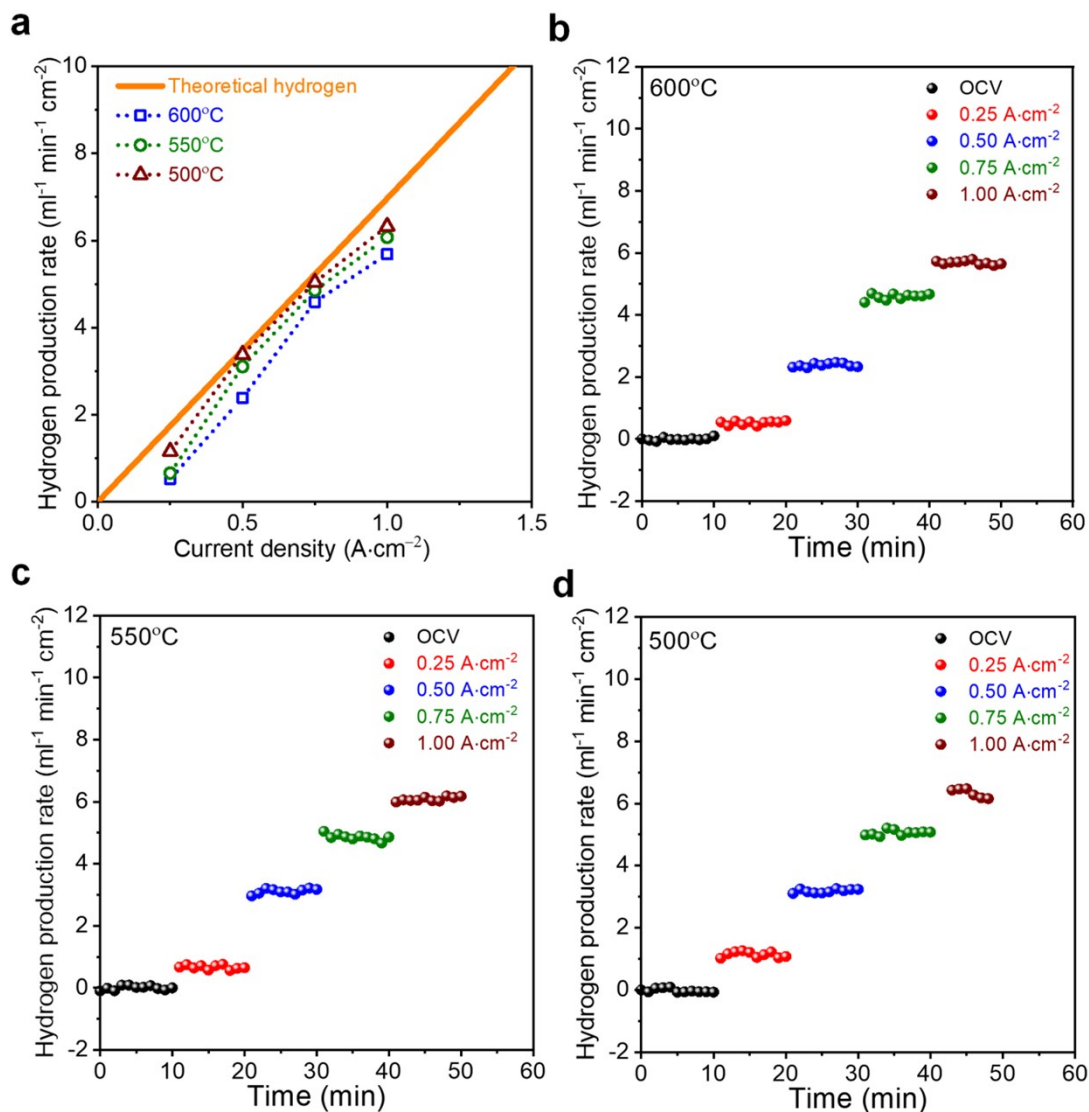

**Fig. S7** Faradaic efficiencies of YEBGC cell at 500–600 °C. (a) Hydrogen production rates as a function of current density with theoretical values. (b-d) Hydrogen production rate as a function of time scale at (b) 600, (c) 550, and (d) 500 °C under applied current density 0.25–1  $\text{A}\cdot\text{cm}^{-2}$ .
